# Supplementary material for: Localized cancer photodynamic therapy approach based on core–shell electrospun nanofibers
Source: Royal Society of Chemistry journal article supplement (doi:10.1039/d4ma00647j), 2024-01-01
Supplement: d4ma00647j1.pdf [file d4ma00647j1.pdf]

## Supplementary Information

### Localized Cancer Photodynamic Therapy approach based on Core-Shell Electrospun Nanofibers

Sofia M. Costa,<sup>a,\*</sup> Leandro M. O. Lourenço,<sup>b</sup> Ricardo C. Calhelha,<sup>c,d</sup> Isabel Calejo,<sup>e</sup> Cristina C. Barrias,<sup>e,f,g</sup> Raul Fangueiro<sup>a</sup> and Diana P. Ferreira<sup>a,\*</sup>

<sup>a</sup>: Centre for Textile Science and Technology (2C2T), University of Minho, 4800–058 Guimarães, Portugal.

<sup>b</sup>: LAQV-REQUIMTE, Department of Chemistry, University of Aveiro, 3810-193 Aveiro, Portugal.

<sup>c</sup>: Centro de Investigação de Montanha (CIMO), Instituto Politécnico de Bragança, Campus de Santa Apolónia, 5300-253 Bragança, Portugal.

<sup>d</sup>: Laboratório Associado para a Sustentabilidade e Tecnologia em Regiões de Montanha (SusTEC), Instituto Politécnico de Bragança, Campus de Santa Apolónia, 5300-253 Bragança, Portugal.

<sup>e</sup>: i3S – Instituto de Investigação e Inovação em Saúde, Universidade do Porto, Portugal.

<sup>f</sup>: INEB – Instituto de Engenharia Biomédica, Universidade do Porto, Portugal.

<sup>g</sup>: ICBAS – Instituto de Ciências Biomédicas Abel Salazar, Universidade do Porto, Portugal.

\*Corresponding authors: [sofiamcosta@det.uminho.pt](mailto:sofiamcosta@det.uminho.pt) and [diana.ferreira@det.uminho.pt](mailto:diana.ferreira@det.uminho.pt)

#### Contents

|                                                                                                   |   |
|---------------------------------------------------------------------------------------------------|---|
| 1. Structural characterization of TPPF <sub>16</sub> [S-CH <sub>2</sub> -COOH] <sub>4</sub> ..... | 2 |
| 2. Singlet oxygen generation .....                                                                | 4 |
| 3. Confocal Laser Scanning Microscopy (CLSM).....                                                 | 4 |

## 1. Structural characterization of $\text{TPPF}_{16}[\text{S-CH}_2\text{-COOH}]_4$

$^1\text{H}$  NMR (300 MHz,  $\text{DMSO-}d_6$ ):  $\delta$  -3.20 (s, 2H), 4.03 (s, 8H,  $-\text{CH}_2$ ), 9.35 (s, 8H,  $\beta\text{-H}$ ).  $^{19}\text{F}$  NMR (282 MHz,  $\text{DMSO-}d_6$ ):  $\delta$  -163.44 (dd,  $J = 10.6$  and  $26.5$  Hz, 8F, Ar- $m$ -F), -158.45 (dd,  $J = 10.6$  and  $26.5$  Hz, 8F, Ar- $o$ -F).  $^{13}\text{C}$  NMR (126 MHz,  $\text{CD}_3\text{OD}$ ):  $\delta$  70.3, 105.9, 117.8, 121.3, 126.8, 128.2, 129.7, 136.1, 139.1, 146.7, 147.3, 148.7, 149.3, 157.1, 180.9. HRMS (ESI)  $m/z$ : calcd for  $\text{C}_{52}\text{H}_{22}\text{F}_{16}\text{N}_4\text{O}_8\text{S}_4$  ( $\text{M}+\text{H}$ ) $^+$ : 1263,0065; found 1263.0084.

### NMR spectroscopy

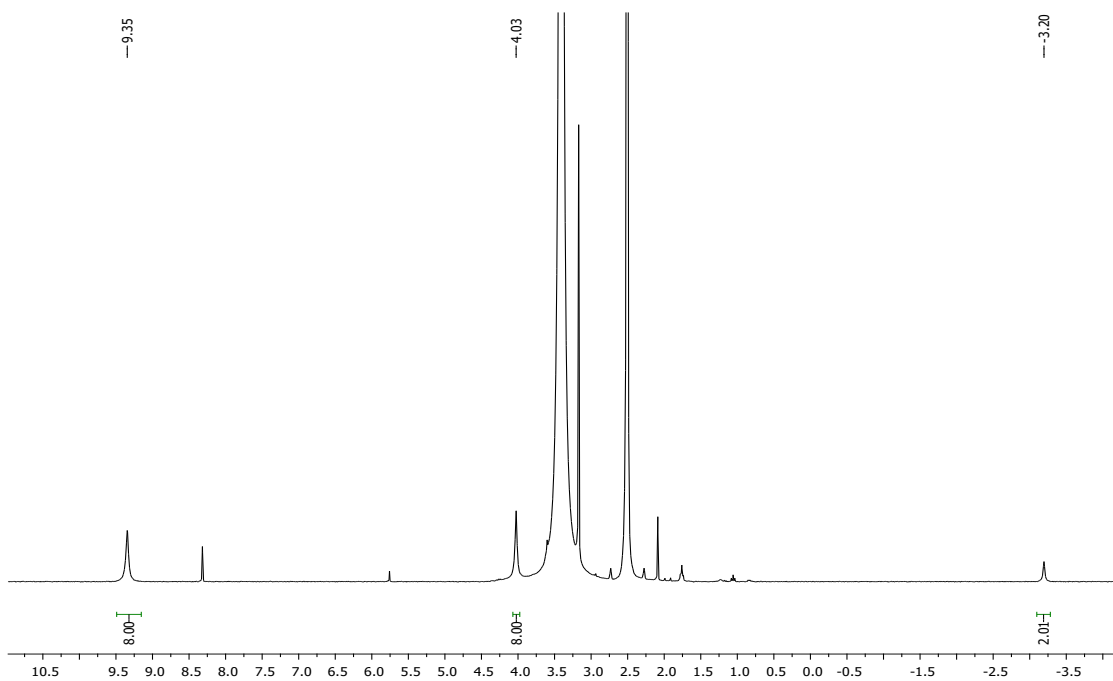

**Fig. S1**  $^1\text{H}$  NMR spectroscopy of  $\text{TPPF}_{16}[\text{S-CH}_2\text{-COOH}]_4$  in  $\text{DMSO-}d_6$ .

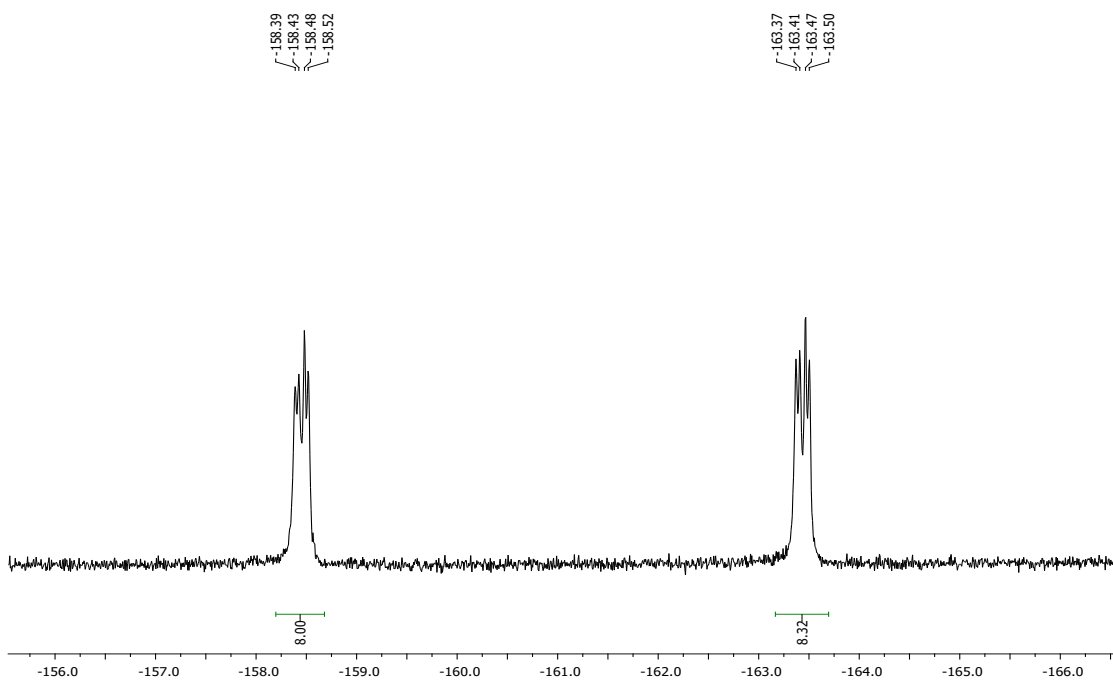

**Fig. S2**  $^{19}\text{F}$  NMR spectroscopy of  $\text{TPPF}_{16}[\text{S-CH}_2\text{-COOH}]_4$  in  $\text{DMSO-}d_6$ .

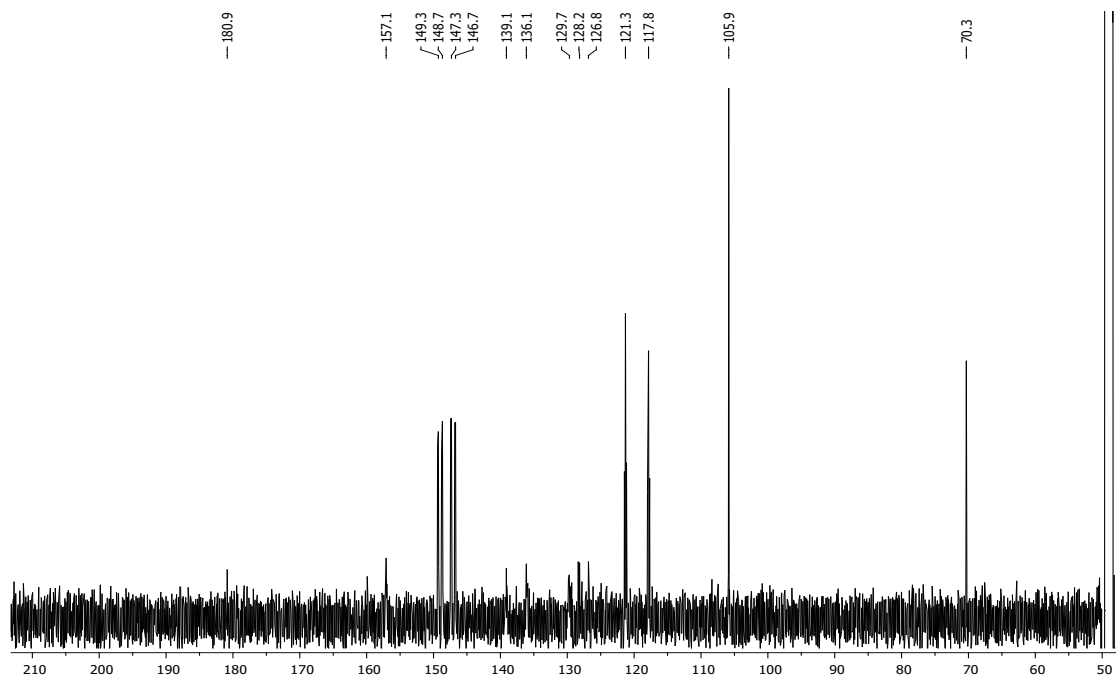

**Fig. S3**  $^{13}\text{C}$  NMR spectroscopy of  $\text{TPPF}_{16}[\text{S-CH}_2\text{-COOH}]_4$  in  $\text{CD}_3\text{OD}$ .

High Resolution Mass Spectrometry

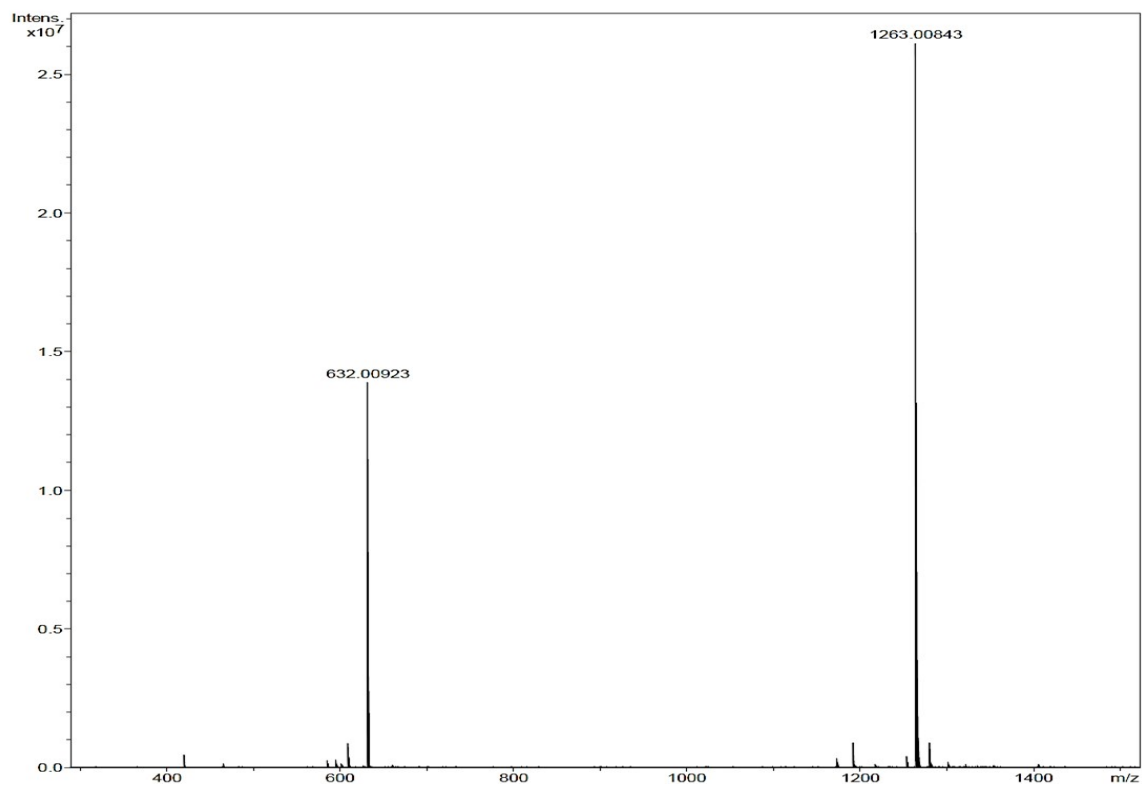

**Fig. S4** ESI-HRMS of  $\text{TPPF}_{16}[\text{S-CH}_2\text{-COOH}]_4$ .

## 2. Singlet oxygen generation

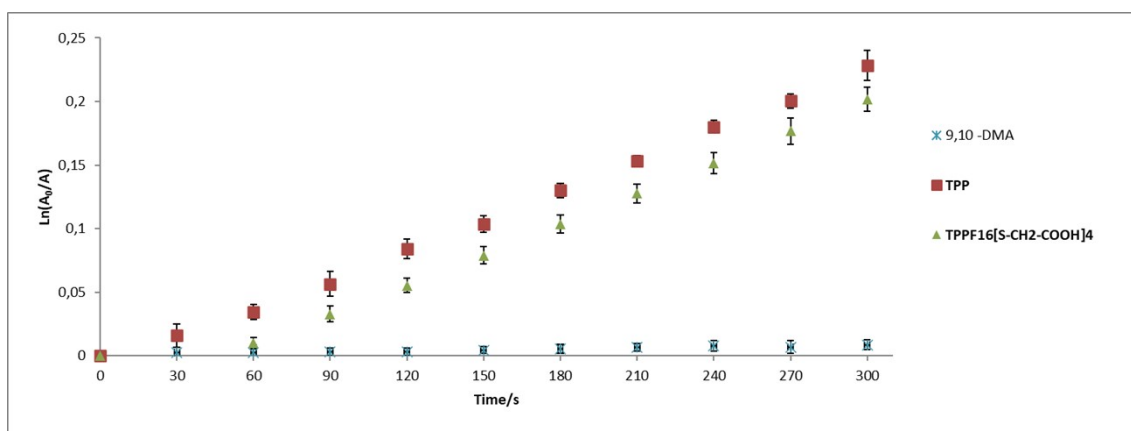

**Fig. S5** Time-dependent photodecomposition of 9,10-DMA ( $\sim 135 \mu\text{M}$ ) alone and in the presence of  $\text{TPPF}_{16}[\text{S-CH}_2\text{-COOH}]_4$  at an OD at  $\sim 420 \text{ nm}$  of  $\sim 0.3$  in DMF upon irradiation with red light LEDs ( $418 \text{ nm} \pm 1 \text{ nm}$ ). Error bars indicate the SD and in some cases are collapsed with the symbols.

## 3. Confocal Laser Scanning Microscopy (CLSM)

To confirm that the red fluorescence observed in PVA-Gel + Por nanofibers was due to the presence of Por, PVA-Gel nanofibers (without Por) were used as a control. The samples were excited at  $405 \text{ nm}$  and showed no fluorescence, indicating the absence of Por. Thus, it can be concluded that the red fluorescence detected in Por-loaded PVA-Gel nanofibers was derived from the Por.

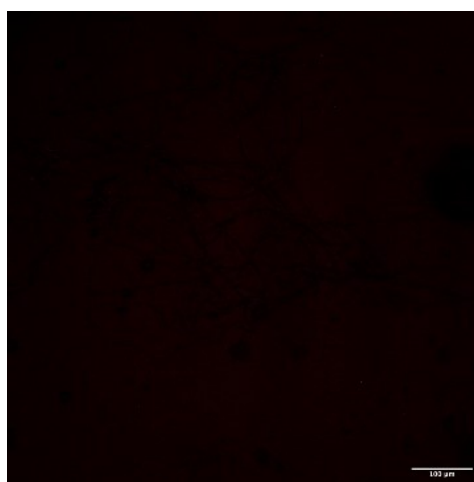

**Fig. S6** CLSM image of PVA-Gel nanofibers excited at  $405 \text{ nm}$  and detected at  $500\text{-}699 \text{ nm}$ .
